# Supplementary material for: Characterizing the heterogeneity of triple-negative breast cancers using microdissected normal ductal epithelium and RNA-sequencing
Source: Springer Nature journal article supplement (doi:10.1007/s10549-013-2780-y), 2013-11-28
Supplement: MOESM1 [file 10549_2013_2780_MOESM1_ESM.docx]

**SUPPLEMENTAL METHODS**

**Normal breast tissues and TNBCs from Indiana University used for RNA sequencing**

Fresh-frozen normal breast tissues (10 gauge cores) from healthy pre-menopausal volunteers with no history of breast cancer were procured from the Susan G. Komen for the Cure® Tissue Bank at the IU Simon Cancer Center. Cores were embedded in OCT, sectioned (8µM thick) and the sections placed on PEN Membrane Glass Slides (Molecular Devices, Sunnyvale, CA). Cores were sectioned in their entirety and all sections were microdissected. Slides were kept at -80°C prior to dissection. Three slides were removed from the freezer at a time, and were stained using the HistoGene LCM Frozen Section Staining Kit (Arcturus). All dissections were completed within one hour of thawing to minimize RNA degradation. RNA from captured cells were extracted and quantified using the Qubit Fluorometer (Invitrogen, Carlsbad, CA). Because of the lower yields associated with LCM, the entire amount of RNA was used for the RNA-seq library preparation. RNA from ten triple-negative breast cancers (TNBC) were procured from OriGene Technologies. All samples were pathologically verified for high tumor content and did not necessitate microdissection. All samples were quantified using the Qubit Fluorometer (Invitrogen). There was an abundance of available RNA from the TNBCs, so 5µg was used for RNA-seq library preparation. The use of all samples including normals and TNBCs were approved for use by the Indiana University Institutional Review Board.

**Next-Generation RNA-Sequencing of Microdissected Normals and IU TNBCs and Read Mapping**

RNA samples were first enriched for the transcriptome by depleting the samples of large and small ribosomal RNA (rRNA) using the RiboMinus Eukaryote Kit (Invitrogen). Library preparation was then performed using the SOLiD Whole Transcriptome Analysis Kit or Total RNA-seq Kit (Life Technologies, Foster City, CA). Each library was barcoded by using PCR primers containing different barcodes to allow multiple samples to be sequenced simultaneously on the Life Technologies SOLiD system. Emulsion PCR and bead preparation was conducted according to manufacturer’s instructions. Amplified beads were sequenced on the Life Technologies SOLiD system using 50bp fragment, or 50 x 35bp paired-end runs. Output data (.csfasta and .qual) files were converted to standard XSQ format for data analysis. XSQ files containing the read sequences and quality values were loaded onto a compute cluster and the reads were mapped in colorspace using the Life Technologies LifeScope 2.5.1 software using default parameters. Reads were mapped to the human genome (hg19) downloaded from the UCSC Genome Bioinformatics Site (<http://genome.ucsc.edu>). The hg19 genome was slightly modified by deleting the Y chromosome in order to make a female genome. An hg19 exon reference file provided by Life Technologies was required by LifeScope in order to create the exon junction libraries needed to map reads that cross exon boundaries. This file was derived from the refGene database from UCSC. Also, a human filter reference file was required (provided by Life Technologies) that contains the sequences of ribosomal and repetitive regions of the genome in order to filter reads that mapped to those regions. Mapped reads were outputted in the standard BAM (Binary Alignment/Map) format.

**TCGA TNBC and Adjacent Normal RNA-Seq Data**

Clinical data from TCGA was downloaded from the TCGA data portal (<https://tcga-data.nci.nih.gov/tcga/>). The file clinical_patient_all_BRCA.txt was used to identify triple-negative breast cancer patients. Samples were filtered for a variety of criteria, including ER negativity, PR negativity, HER-2 IHC Negative or HER-2 Equivocal AND FISH Negative, and histology of IDC only. Corresponding TNBC BAM files were downloaded using the UCSC cgHub database via the cgquery and GeneTorrent utilities. If adjacent normal was available, the corresponding BAM file was also downloaded. Data was downloaded under NIH dbGAP approval Project #3317: Transcriptional and Mutational Landscape of Triple-Negative Breast Cancer (P.I. Milan Radovich).

**Data Analysis**

Mapped reads (BAM Files) for TCGA TNBCs and adjacent normal tissues were downloaded from UCSC CGHub were merged with BAM files from TNBCs and normal breast tissues from Indiana University. BAM files were imported into Partek Genomics Suite 6.6 (Partek Incorporated, St. Louis, MO) for gene expression analysis. First, reads were cross-referenced against the RefSeq database (downloaded from UCSC) and RPKM values generated for each gene. Refseq is a database of ~20,000 highly annotated (mostly protein coding) genes. Low expressing genes (defined as median RPKM<0.3) in TNBCs or normals were excluded. RPKM data was then log2 transformed and batch corrected to account for differences in sequencing center. Extensive QC was performed to ensure proper integration. Differential expression between tissue types were performed using a two-way ANOVA to account for batch and sample type. Genes with a False Discovery Rate (FDR) < 5% were considered significant. All Principal Component Analyses (PCA) were performed in Partek Genomics Suite 6.6. All pathway, network, and upstream regulator analyses were performed using IPA 9.0 (Ingenuity Systems, Redwood City, CA). In order to perform Vanderbilt TNBC subtyping: Supplemental Table 3 from Lehmann et al. JCI 2011, was downloaded. A total of 2188 genes were used for subtyping in that paper. Our data had 2118 of those genes. RPKM data was filtered for those 2118 genes for TCGA TNBCs and IU TNBCs separately. Data was log2 transformed and submitted to TNBC subtyping website: <https://cbc.mc.vanderbilt.edu/tnbc/>. To perform PAM50 analysis, we used the R package ‘genefu’ to subtype our samples for the intrinsic subtypes. Because PAM50 analysis works best on breast cancer datasets where all the instrinisic subtypes are represented, we downloaded RPKM data for the entire breast cancer TCGA project from the TCGA public data portal. RPKM data was log2 transformed with a +1 offset and the genes corresponding to the PAM50 were copied to a new file and run through genefu to derive the intrinsic subtypes. To perform transcriptional chaos analysis RPKM data for each individual TNBC was compared to the set of 20 microdissected normal breast tissue using a two-way ANOVA to account for batch and sample type. In order to establish statistical variance, in each of the 94 ANOVAs, the entire TNBC and microdissected normal breast dataset was used. To associate transcriptional chaos with non-silent DNA mutations, we first downloaded the mutational counts for the TCGA breast cancer (BRCA) project from the public Broad Firehose (Downloaded 03/26/2013 from MutSigv2.0 nozzle filename: gdac.broadinstitute.org_BRCA-TP.MutSigNozzleReport2.0.Level_4.2013032600.0.0.tar.gz, after unpacking we used the BRCA-TP.patients.counts_and_rates file). We used the “nnon_tot” column of the BRCA-TP.patients.counts_and_rates file and then merged the non-silent DNA mutation count data with the transcriptional chaos data. A pearson correlation was then performed to derive an r value and p-value. 27 genes which has an r > 0.5 were imported into IPA to understand function. To associate transcriptional chaos with Age, Stage, and Race, we correlated the number of differentially expressed genes (transcriptional chaos) with age, stage, and race using pearson linear correlation, spearman rank correlation, and ANOVA, respectively.

**qPCR & IHC Validation**

A separate cohort of ten fresh-frozen normal breast tissues from healthy pre-menopausal volunteers with no history of breast cancer was procured from the Susan G. Komen for the Cure® Tissue Bank at the Indiana University Simon Cancer Center. In this validation cohort, five samples were from women in the follicular phase of the menstrual cycle, and five women in the luteal phase, the same as the sequencing cohort. These samples were also laser capture microdissected for ductal epithelium followed by RNA extraction with the miRNeasy Mini Kit (Qiagen) which extracts both full-length and microRNA. In addition, a separate cohort of 26 fresh-frozen TNBC tumors was procured from the Indiana University Simon Cancer Center Tissue Bank and from Asterand plc. The 26 TNBC tumors represented a mixture of pre- and post-menopausal patients. RNA was extracted from the 26 TNBC samples using the miRNeasy Mini Kit (Qiagen). All samples were quantified using the Qubit Fluorometer (Invitrogen).

TaqMan qPCR was performed using the following inventoried TaqMan assays from Life Technologies:

| **Gene Symbol** | **Gene Name** | **Assay Type** | **Assay ID** |
| --- | --- | --- | --- |
| EGFR | epidermal growth factor receptor | Target | Hs01076091_m1 |
| KIT | v-kit Hardy-Zuckerman 4 feline sarcoma viral oncogene homolog | Target | Hs00174029_m1 |
| PARP1 | poly (ADP-ribose) polymerase 1 | Target | Hs00242302_m1 |
| HNRNPH1 | heterogeneous nuclear ribonucleoprotein H1 (H) | Housekeeper | Hs00800662_sH |
| IPO8 | importin 8 | Housekeeper | Hs00183533_m1 |

The housekeeping genes, HNRNPH1 & IPO8, were chosen for their low coefficient of variation among the samples in the next-generation sequencing data. 20ng of RNA from each sample of the validation cohort was reversed transcribed using the High Capacity RNA-to-cDNA kit (Life Technologies). cDNA was then pre-amplified using TaqMan PreAmp Master Mix (Life Technologies) and the TaqMan assays per manufacturer’s instructions. qPCR of target genes and housekeepers was performed in triplicate using TaqMan Gene Expression Master Mix (Life Technologies) and the above listed assays. qPCR reactions were run on an ABI 7900HT Real-Time PCR System and data analyzed using the SDS2.3 and DataAssist v2.0 software from Life Technologies. Fold change was calculated using the standard ΔΔCt method incorporating the geometric mean of the housekeepers. Error bars represent the Standard Error of the Mean (S.E.M). P-values were calculated using student’s two-sample t-test.

IHC was performed for EGFR using the Dako EGFR PharmDX Kit per manufacturer’s instructions (Dako, Denmark). For KIT, slides were deparaffinized using successive ethanol and xylene washes followed by antigen retrieval in a pressure cooker using TRS low pH buffer (Dako). Slides were incubated in 3% hydrogen peroxide for 10 minutes and then rinsed. The slides were then incubated with an anti-human c-Kit antibody (Dako) at a 1:200 dilution for 10 minutes and then rinsed. This slides were then incubated with Flex reagent + Rabbit linker (Dako) for 10 minutes then rinsed, followed by and incubation with Flex reagent HRP for 10 minutes and rinsed, followed by incubation with Flex reagent DAB for 5 minutes and then rinsed. Slides were then counterstained, dehydrated, and then coversliped. Slides were then read and scored by an experienced breast pathologist (Dr. Sunil Badve). Data analysis was performed by calculating a H-score for each sample (Intensity x % cellular staining) followed by statistical comparison using student’s two-sample t-test. Error bars represent the standard deviation.
